# Supplementary material
Source: PubMed Central journal article supplement (PMC6669861)

**Figure S1.** Hematoxylin & Eosin staining of blood vessels in cortical bone (A-L) and bone marrow (M-X) in mouse tibiae. Scale bars=50  $\mu$ m.

**Figure S2.** Hematoxylin & Eosin staining of blood vessels in cortical bone (A-L) and bone marrow (M-X) in rat tibiae. Scale bars=50  $\mu$ m.

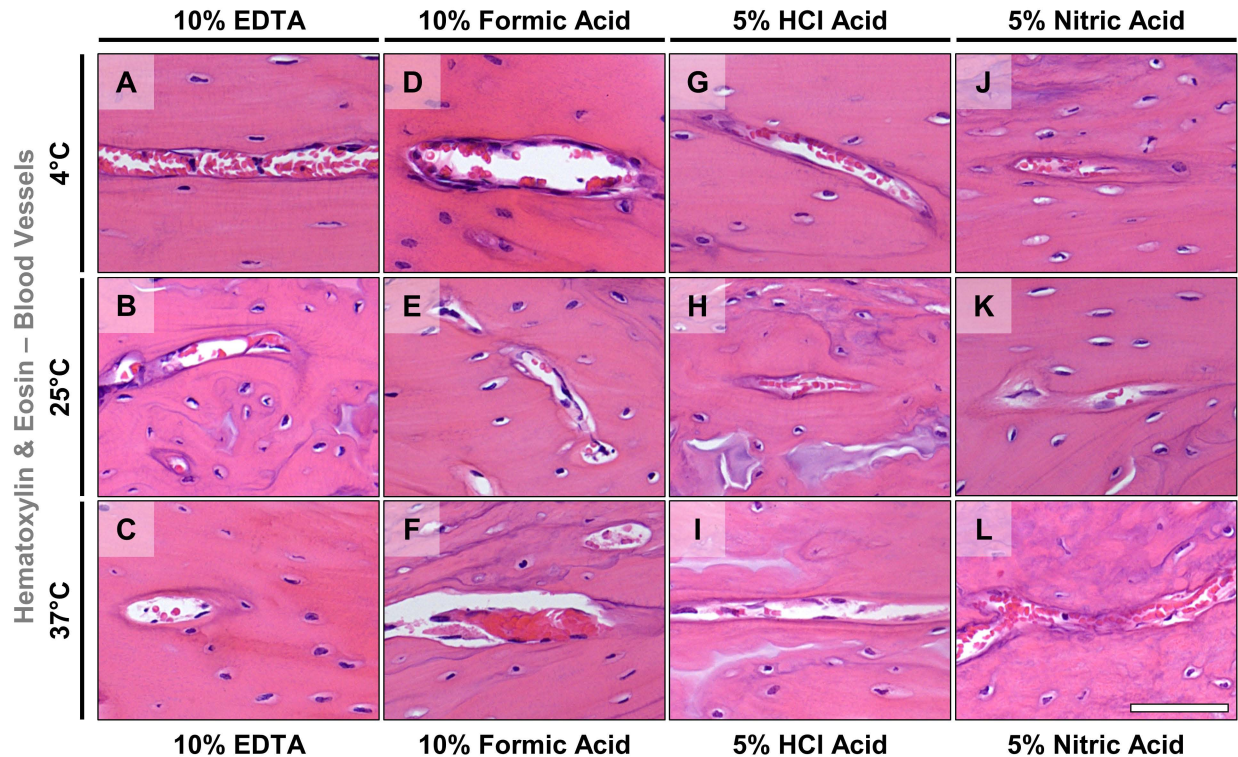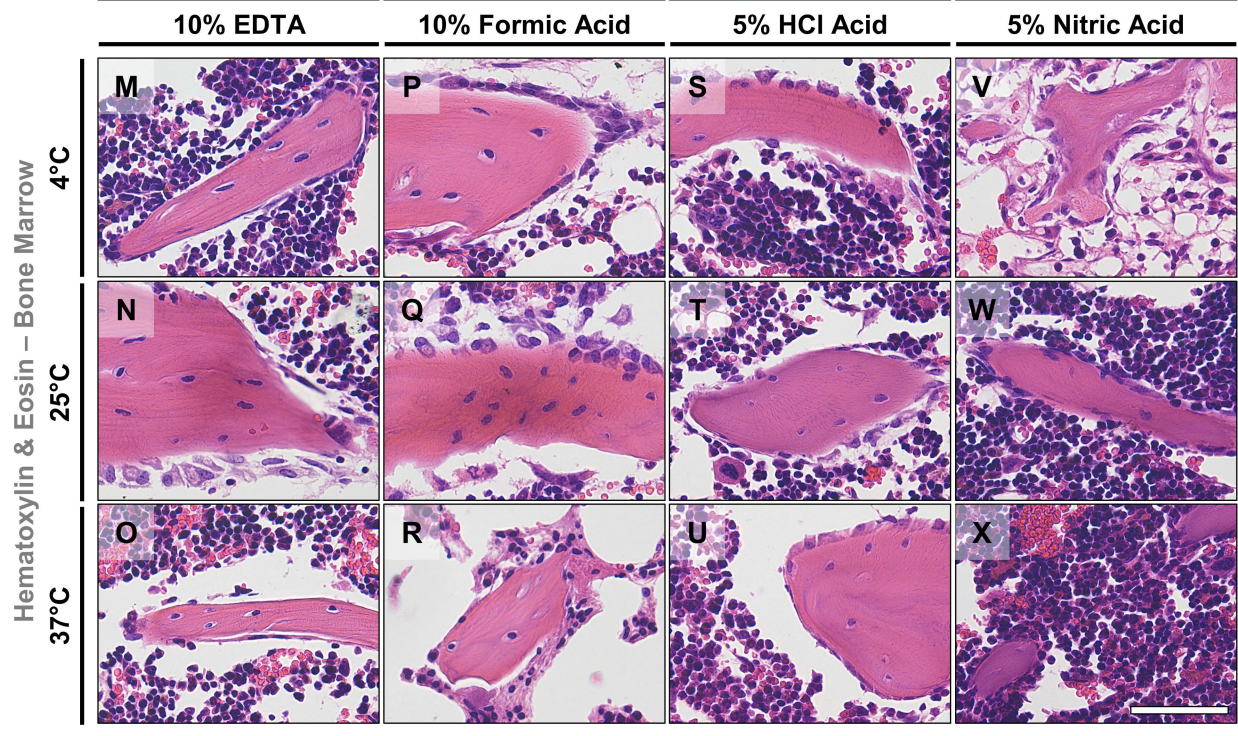



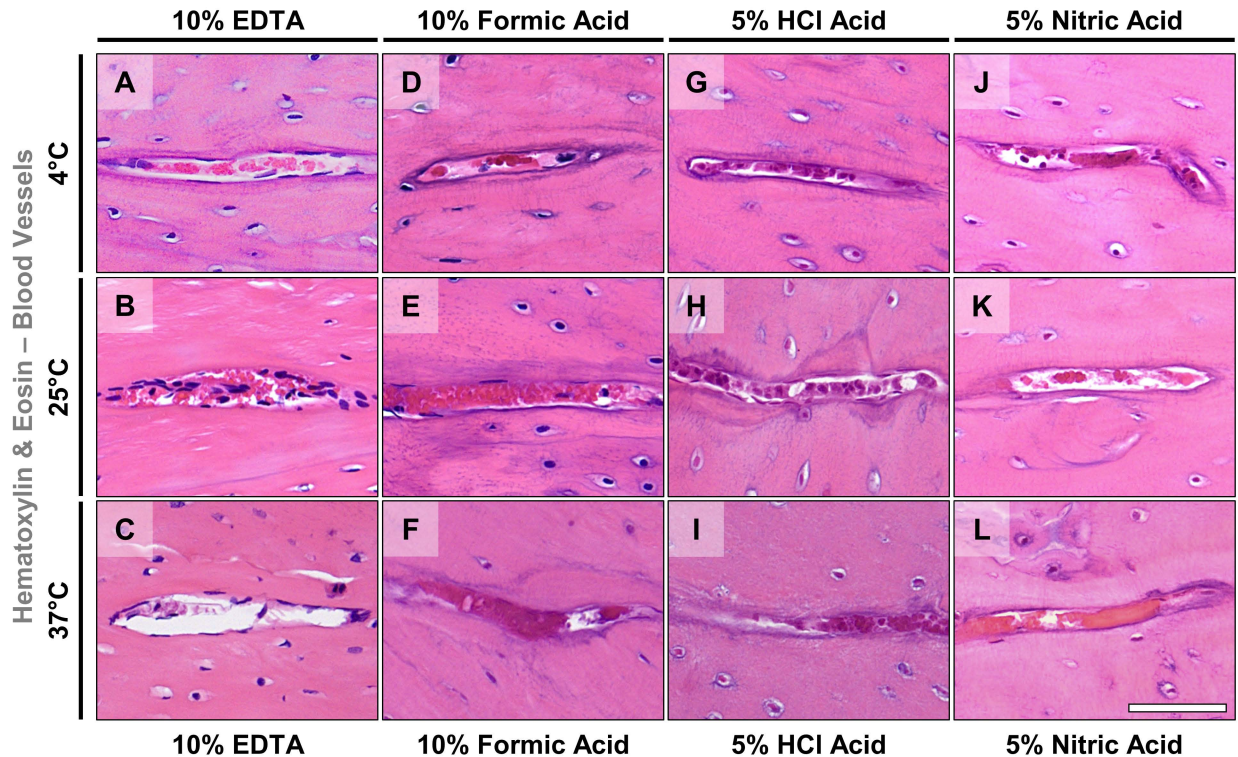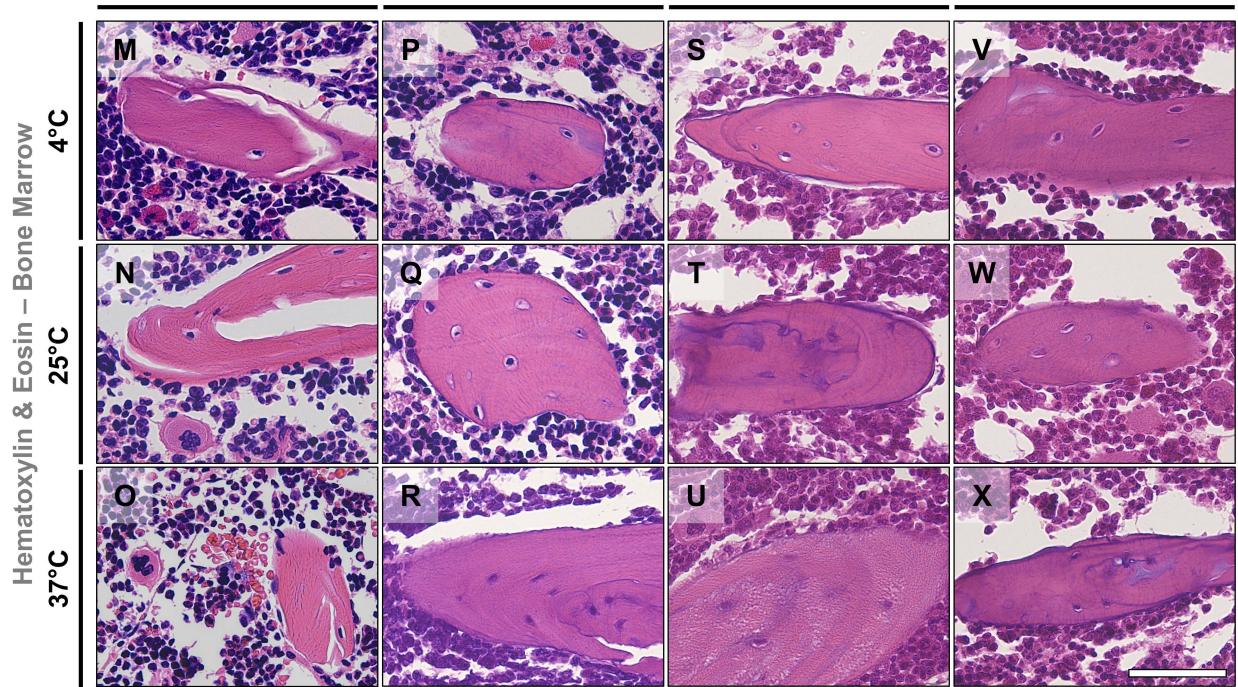

Supplement: DS_10.1369_0022155419850099.pdf [file DS_10.1369_0022155419850099.pdf]
